# Supplementary material for: Preparation of High Water-Soluble Trichoderma Co-Culture Metabolite Powder and Its Effects on Seedling Emergence Rate and Growth of Crops
Source: MDPI journal article supplement (doi:10.3390/jof9070767), 2023-07-20
Supplement: s1 [file s1]

## Supplementary materials 1

### 1. Fungal Strains

| Strain               | Strain number       | Collection location                      |
|----------------------|---------------------|------------------------------------------|
| T. cf. asperelloides | CTCCSJ-A-CM100Z4-1  | Shanghai Chongming Wenzhou Mandarin bark |
| T. cf. afroharzianum | CTCCSJ-W-RW10569-1  | Hainan - Wetland - soil                  |
| T. cf. kunmingense   | CTCCSJ-A-GDFS1009-1 | Guangdong - farmland - soil              |
| T. cf. asperelloides | CTCCSJ-W-SBW10264-1 | Hainan - Wetland - soil                  |

We tested the strains for salt tolerance, high-temperature tolerance and chitinase activity. High-temperature-tolerant *Trichoderma* Z4-1, high-salt-tolerant *Trichoderma* 1009-1, high-chitinase-producing *Trichoderma* 10569-1, and the mixed fermentation of *Trichoderma echinospora* 10264-1 and the abovementioned Z4-1, 1009-1 and 10569-1 were the best for seed germination. The above four strains were selected for subsequent experiments. The accession number of 1009-1 is OP799503; The accession number of 10264-1 is OP799504; The accession number of 10569-1 is OP799505; The accession number of Z4-1 is OP799506.

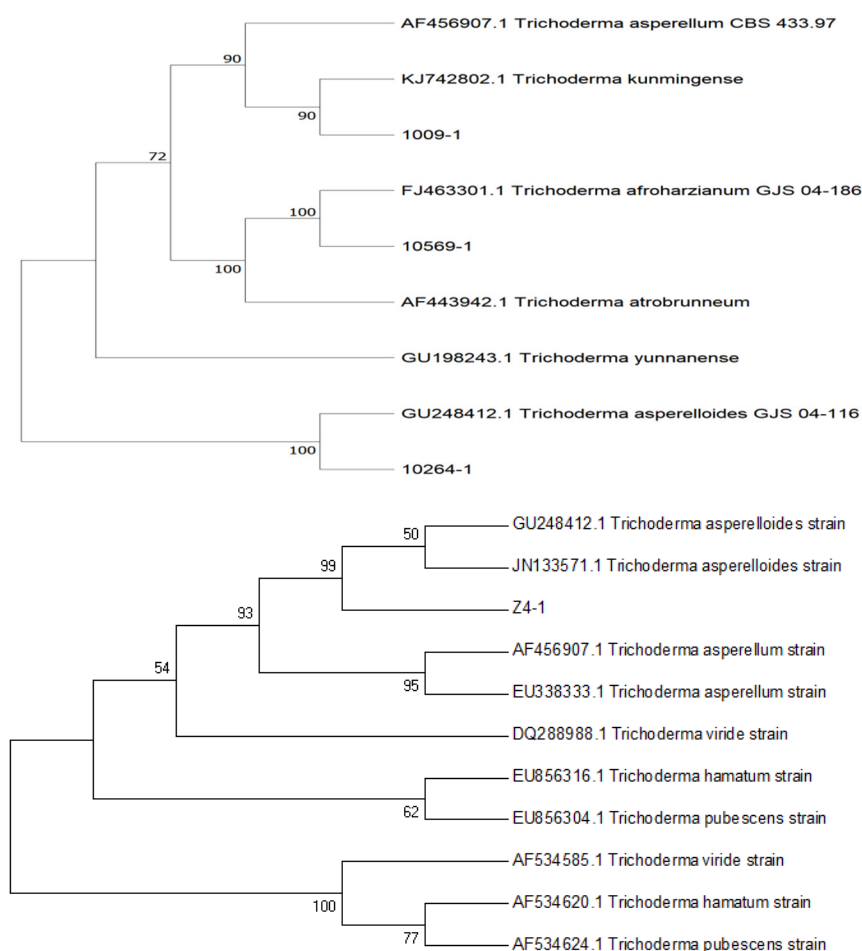

Z4-1 was identified as *Trichoderma asperelloide*. 1009-1 was identified as *Trichoderma* . cf. Kunmingense. 10569-1 was identified as *Trichoderma* . cf. Afroharzianum. 10264-1 was identified as *Trichoderma* . cf. asperelloides

## Supplementary materials 2

### 2. Basic characteristics of the ten carriers

Pregelatinized starch: Sodium carboxymethyl starch (C<sub>6</sub>H<sub>10</sub>O<sub>5</sub>)<sub>n</sub> (n=300~1000) containing 5% free amylose, 15% free amylopectin and 80% unmodified starch; pH=4.5-7.0.

$\beta$ -Cyclodextrin: Cyclomaltose and cycloheptadrin composed of 7 glucose residues in the  $\beta$ -A ring formed by the binding of 1,4-glycosidic bonds;  $C_{42}H_{70}O_{35} \cdot xH_2O$ , pH=5.0-8.0.

XW-maltodextrin: Starch, polysaccharides, tetrasaccharide or oligosaccharides mixed with the tetrasaccharides maltose and glucose ( $C_6H_{10}O_5$ )<sub>n</sub>, pH=4.5-6.5.

LG-maltodextrin: Starch, polysaccharide, tetrasaccharide or oligosaccharide above tetrasaccharide, maltose and mineral mixtures such as glucose, calcium and iron; ( $C_6H_{10}O_5$ )<sub>n</sub>, pH=4.5-6.5.

Dextrin: Starch, polysaccharide, tetrasaccharide or oligosaccharide above tetrasaccharide, and small amounts of maltose and glucose, calcium and iron mixture; ( $C_6H_{10}O_5$ )<sub>n</sub>.

Jiayi powder: A high-tech composite made of a variety of minerals, inorganic salts, modified starch and other auxiliary materials through special processing.

Jiawei powder: Minerals and soluble starch; pH=5.5-8.0.

**Disclaimer/Publisher's Note:** The statements, opinions and data contained in all publications are solely those of the individual author(s) and contributor(s) and not of MDPI and/or the editor(s). MDPI and/or the editor(s) disclaim responsibility for any injury to people or property resulting from any ideas, methods, instructions or products referred to in the content.
